# Supplementary material for: Evaluating Social Interactions Using the Autism Screening Instrument for Education Planning-3rd Edition (ASIEP-3): Interaction Assessment in Children and Adults with Fragile X Syndrome
Source: MDPI journal article supplement (doi:10.3390/brainsci10040248), 2020-04-22
Supplement: s1 [file s1]

# ASIEP Checklist

## Overall Assessment

Examiner: \_\_\_\_\_ Recorder: \_\_\_\_\_ Date of Assessment: \_\_\_\_\_

|                                | Activities offered<br>during ASIEP | Activities engaged<br>with during ASIEP |
|--------------------------------|------------------------------------|-----------------------------------------|
| Blocks                         | <input type="checkbox"/>           | <input type="checkbox"/>                |
| Playing Cards                  | <input type="checkbox"/>           | <input type="checkbox"/>                |
| Play House/Tea Party           | <input type="checkbox"/>           | <input type="checkbox"/>                |
| Garage/Fire station            | <input type="checkbox"/>           | <input type="checkbox"/>                |
| Big Pegboard                   | <input type="checkbox"/>           | <input type="checkbox"/>                |
| Basic Puzzle                   | <input type="checkbox"/>           | <input type="checkbox"/>                |
| Felt Board/Paper Dolls         | <input type="checkbox"/>           | <input type="checkbox"/>                |
| Coloring                       | <input type="checkbox"/>           | <input type="checkbox"/>                |
| Crafts – Describe: _____       | <input type="checkbox"/>           | <input type="checkbox"/>                |
| Board Game – Name: _____       | <input type="checkbox"/>           | <input type="checkbox"/>                |
| Sensory toys – Describe: _____ | <input type="checkbox"/>           | <input type="checkbox"/>                |
| Book 1 – Name: _____           | <input type="checkbox"/>           | <input type="checkbox"/>                |
| Other 1 – Describe: _____      | <input type="checkbox"/>           | <input type="checkbox"/>                |

- 1) Did anything occur that was outside of standard administration/protocol ☐ Yes ☐ No  
(i.e. another person in room, recording failure, child spoke another language)?

*If yes*, describe: \_\_\_\_\_

- 2) Were there reciprocal questions (back and forth conversation) ☐ Yes ☐ No  
at any point in the assessment?

*If yes*, during which phase? (check all that apply) ☐ Active Modeling ☐ Passive ☐ Direct Cues

- 3) At any point in the assessment did the participant imitate something ☐ Yes ☐ No  
the examiner or the recorder did or said?

*If yes*, did the imitation occur immediately or was it delayed? ☐ Immediate ☐ Delayed

Describe: \_\_\_\_\_

- 4) Were there any aggressive/negative behaviors during assessment? ☐ Yes ☐ No

*If yes*, during which phase? (check all that apply) ☐ Active Modeling ☐ Passive ☐ Direct Cues

Did you intervene? ☐ Yes ☐ No

(A) What happened directly before the behavior (Antecedent): \_\_\_\_\_

(B) Describe the Behavior: \_\_\_\_\_

(C) What happened after the behavior (Consequence): \_\_\_\_\_

If necessary, additional details: \_\_\_\_\_

- 5) Were there any self-stimulatory/self-abuse behaviors ☐ Yes ☐ No ☐ Maybe  
during the assessment?

*If yes or maybe*, during which phase? (check all that apply) ☐ Active Modeling ☐ Passive ☐ Direct Cues

Brief description: \_\_\_\_\_

## ASIEP Checklist

### Passive Phase

- 1) Did subject notice/orient to examiner switching to passive phase? ☐ Yes ☐ No

*If yes*, complete the following:

- **Is there a change in the subject's emotional state?** ☐ Yes ☐ No

*If yes*, check which changes were observed (check all that apply)

- ☐ Emotional ☐ Sensitive/Concern ☐ Irritability  
☐ Aggression ☐ Tear-up

- **Does the subject look at the examiner?** ☐ Yes ☐ No

- **Does the subject look at the recorder?** ☐ Yes ☐ No

- **Does subject attempt to engage examiner?** ☐ Yes ☐ No

*If yes*, how did the subject attempted to engage **examiner**? (check all that apply)

- ☐ Asked Questions ☐ Attempted to engage in play  
☐ Touched examiner ☐ Other: \_\_\_\_\_

Describe: \_\_\_\_\_

- **Does subject attempt to engage recorder?** ☐ Yes ☐ No

*If yes*, how did the subject attempted to engage **recorder**? (check all that apply)

- ☐ Asked Questions ☐ Attempted to engage in play  
☐ Touched examiner ☐ Other: \_\_\_\_\_

Describe: \_\_\_\_\_

- **Does subject ask questions about examiner's switch to passive?** ☐ Yes ☐ No

*If yes*, do they persist? ☐ Yes ☐ No

- **Please describe any other ways the subject noticed/oriented to examiner switching to passive phase (If applicable):**

\_\_\_\_\_

- 2) Does subject transition independently to a 'play activity' during passive? ☐ Yes ☐ No

- 3) Does subject keep themselves busy during passive phase? ☐ Yes ☐ Part of the time

☐ No ☐ Most of the time

*If most of the time or part of the time*, describe:

\_\_\_\_\_
